# Supplementary material for: Low SARS-CoV-2 seroprevalence in blood donors in the early COVID-19 epidemic in the Netherlands
Source: PubMed Central journal article supplement (PMC7665189; doi:10.1038/s41467-020-19481-7), 2020-11-12
Supplement: 41467_2020_19481_MOESM1_ESM.pdf [file 41467_2020_19481_MOESM1_ESM.pdf]

**Low SARS-CoV-2 seroprevalence in blood donors in the early COVID-19 epidemic in the Netherlands**

Ed Slot, Boris M. Hogema, Chantal B.E.M. Reusken, Johan H. Reimerink, Michel Molier,  
Jan H.M. Karregat, Johan IJlst, Věra M.J. Novotný, René A.W. van Lier, Hans L. Zaaijer

**Supplementary Fig. 1** SARS-CoV-2 antibody signals (OD/CO ratios) using longitudinal samples, collected in April 2020 and prior to February 2020 (pre-outbreak). Signals are shown separately for seroconverting donors (left) and false-reactive (non-seroconverting) donors (right). To assess the consistency of false-reactive test results, archived samples of multiple associated pre-outbreak donations were tested, if available (right).

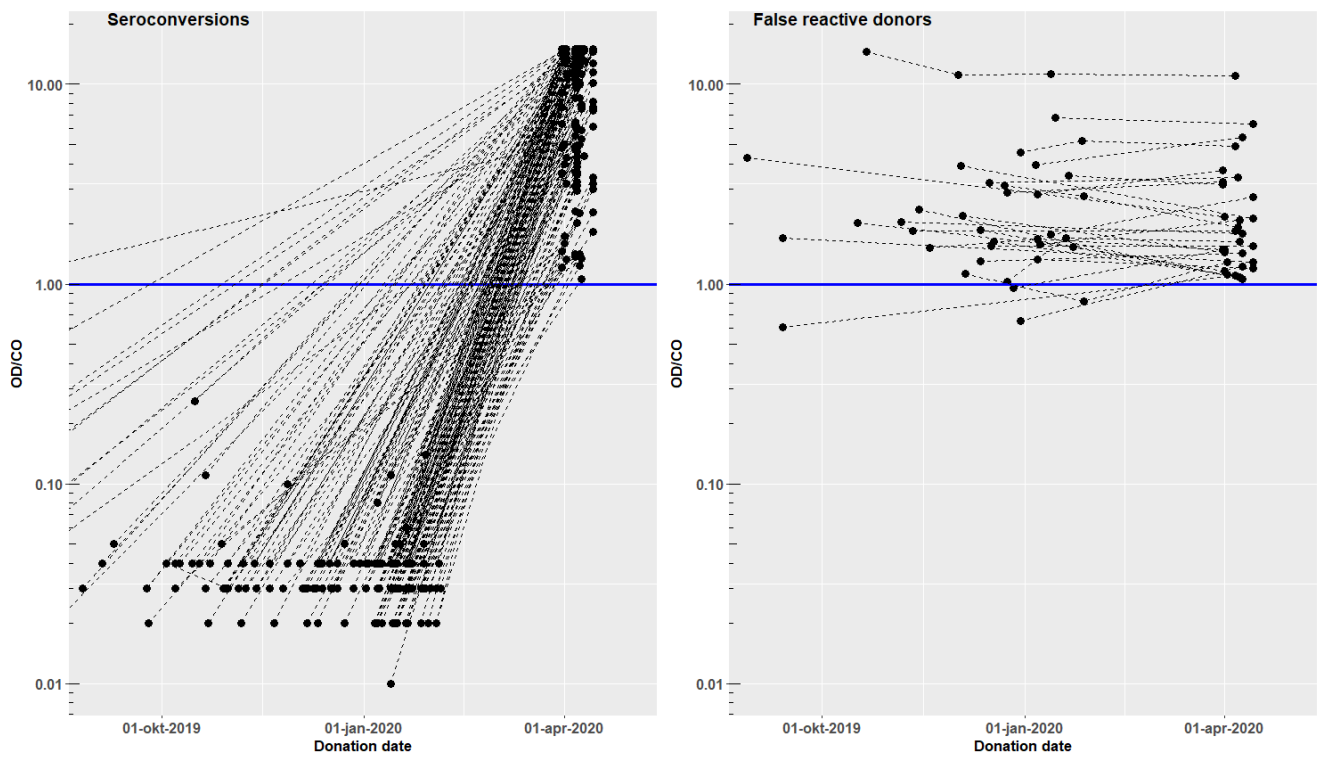

**Supplementary Table 1** Prevalence of anti-SARS-CoV-2 antibodies in the Netherlands; 1-15 April 2020.  
Numbers and percentages are given by region of residence (municipal health region), sex and age group.

| Region of residence<br>(municipal health region) | Donors tested |            | % Positive  | False-reactive | Negative     | Sex                     |                        | Age group              |                      |                        |                        |                        | General population | Tested per 10,000 |
|--------------------------------------------------|---------------|------------|-------------|----------------|--------------|-------------------------|------------------------|------------------------|----------------------|------------------------|------------------------|------------------------|--------------------|-------------------|
|                                                  | Positive      |            |             |                |              | Men                     | Women                  | Age 18-30 yrs          | Age 31-40 yrs        | Age 41-50 yrs          | Age 51-60 yrs          | Age 61-72 yrs          |                    |                   |
| Brabant-Zuid Oost                                | 105           | 10         | 9.5%        | 0              | 95           | 7/65 (10.8%)            | 3/40 (7.5%)            | 2/16 (12.5%)           | 0/12 (0.0%)          | 1/23 (4.3%)            | 5/18 (27.8%)           | 2/36 (5.6%)            | 766,745            | 1.37              |
| Noord en Midden Limburg                          | 277           | 19         | 6.9%        | 1              | 257          | 9/136 (6.7%)            | 10/141 (7.1%)          | 3/27 (11.1%)           | 3/25 (12.0%)         | 4/58 (6.9%)            | 6/96 (6.3%)            | 3/71 (4.2%)            | 518,155            | 5.35              |
| Hart voor Brabant                                | 617           | 36         | 5.8%        | 0              | 581          | 20/295 (6.8%)           | 16/322 (5.0%)          | 8/82 (9.8%)            | 3/78 (3.8%)          | 5/119 (4.2%)           | 8/184 (4.3%)           | 12/154 (7.8%)          | 1,058,365          | 5.83              |
| West-Brabant                                     | 216           | 9          | 4.2%        | 0              | 207          | 3/116 (2.6%)            | 6/100 (6.0%)           | 2/22 (9.1%)            | 0/15 (0.0%)          | 1/53 (1.9%)            | 5/68 (7.4%)            | 1/58 (1.7%)            | 702,870            | 3.07              |
| Zuid Limburg                                     | 445           | 16         | 3.6%        | 1              | 428          | 8/212 (3.8%)            | 8/233 (3.4%)           | 3/55 (5.5%)            | 1/56 (1.8%)          | 1/76 (1.3%)            | 4/136 (2.9%)           | 7/122 (5.7%)           | 599,000            | 7.43              |
| Twente                                           | 254           | 9          | 3.5%        | 2              | 243          | 5/128 (3.9%)            | 4/126 (3.2%)           | 4/56 (7.1%)            | 2/41 (4.9%)          | 0/40 (0.0%)            | 1/65 (1.5%)            | 2/52 (3.8%)            | 627,745            | 4.05              |
| Utrecht                                          | 514           | 18         | 3.5%        | 4              | 492          | 9/280 (3.2%)            | 9/234 (3.8%)           | 5/63 (7.9%)            | 3/68 (4.4%)          | 4/114 (3.5%)           | 4/155 (2.6%)           | 2/114 (1.8%)           | 947,960            | 5.42              |
| Amsterdam                                        | 183           | 6          | 3.3%        | 3              | 174          | 2/79 (2.5%)             | 4/104 (3.8%)           | 3/56 (5.4%)            | 0/38 (0.0%)          | 2/32 (6.2%)            | 0/28 (0.0%)            | 1/29 (3.4%)            | 1,046,450          | 1.75              |
| Gelderland-Zuid                                  | 276           | 9          | 3.3%        | 0              | 267          | 7/140 (5.0%)            | 2/136 (1.5%)           | 2/76 (2.6%)            | 0/27 (0.0%)          | 0/37 (0.0%)            | 3/67 (4.5%)            | 4/69 (5.8%)            | 553,630            | 4.99              |
| Noord en Oost Gelderland                         | 279           | 8          | 2.9%        | 0              | 271          | 4/132 (3.0%)            | 4/147 (2.7%)           | 1/38 (2.6%)            | 1/33 (3.0%)          | 3/58 (5.2%)            | 1/92 (1.1%)            | 2/58 (3.4%)            | 821,125            | 3.40              |
| Volksgezondheid Utrecht                          | 273           | 7          | 2.6%        | 0              | 266          | 4/135 (3.0%)            | 3/138 (2.2%)           | 4/120 (3.3%)           | 1/46 (2.2%)          | 1/37 (2.7%)            | 0/40 (0.0%)            | 1/30 (3.3%)            | 347,480            | 7.86              |
| Hollands Noorden                                 | 340           | 8          | 2.4%        | 1              | 331          | 3/178 (1.7%)            | 5/162 (3.1%)           | 1/53 (1.9%)            | 2/22 (9.1%)          | 2/61 (3.3%)            | 1/112 (0.9%)           | 2/92 (2.2%)            | 655,200            | 5.19              |
| Kennemerland                                     | 148           | 3          | 2.0%        | 2              | 143          | 2/65 (3.1%)             | 1/83 (1.2%)            | 0/24 (0.0%)            | 0/19 (0.0%)          | 1/39 (2.6%)            | 1/40 (2.5%)            | 1/26 (3.8%)            | 541,620            | 2.73              |
| Zuid Holland-Zuid                                | 323           | 6          | 1.9%        | 1              | 316          | 3/172 (1.7%)            | 3/151 (2.0%)           | 2/61 (3.3%)            | 1/50 (2.0%)          | 1/61 (1.6%)            | 1/89 (1.1%)            | 1/62 (1.6%)            | 490,180            | 6.59              |
| Groningen                                        | 216           | 4          | 1.9%        | 2              | 210          | 2/104 (1.9%)            | 2/112 (1.8%)           | 0/76 (0.0%)            | 1/23 (4.3%)          | 0/25 (0.0%)            | 1/48 (2.1%)            | 2/44 (4.5%)            | 582,940            | 3.71              |
| IJsselland                                       | 328           | 6          | 1.8%        | 2              | 320          | 2/167 (1.2%)            | 4/161 (2.5%)           | 3/43 (7.0%)            | 1/44 (2.3%)          | 1/65 (1.5%)            | 0/103 (0.0%)           | 1/73 (1.4%)            | 523,560            | 6.26              |
| Zaanstreek/Waterland                             | 221           | 4          | 1.8%        | 1              | 216          | 4/112 (3.6%)            | 0/109 (0.0%)           | 0/32 (0.0%)            | 1/27 (3.7%)          | 0/38 (0.0%)            | 2/78 (2.6%)            | 1/46 (2.2%)            | 334,740            | 6.60              |
| Hollands Midden                                  | 657           | 10         | 1.5%        | 4              | 643          | 6/407 (1.5%)            | 4/250 (1.6%)           | 5/125 (4.0%)           | 1/77 (1.3%)          | 0/102 (0.0%)           | 3/196 (1.5%)           | 1/157 (0.6%)           | 794,340            | 8.27              |
| Zeeland                                          | 238           | 3          | 1.3%        | 1              | 234          | 1/134 (0.7%)            | 2/104 (1.9%)           | 1/33 (3.0%)            | 0/25 (0.0%)          | 2/45 (4.4%)            | 0/69 (0.0%)            | 0/66 (0.0%)            | 382,325            | 6.23              |
| Haaglanden                                       | 399           | 5          | 1.3%        | 2              | 392          | 3/228 (1.3%)            | 2/171 (1.2%)           | 3/61 (4.9%)            | 1/56 (1.8%)          | 0/70 (0.0%)            | 1/119 (0.8%)           | 0/93 (0.0%)            | 1,093,180          | 3.65              |
| Drenthe                                          | 158           | 1          | 0.6%        | 0              | 157          | 0/74 (0.0%)             | 1/84 (1.2%)            | 0/17 (0.0%)            | 0/18 (0.0%)          | 0/32 (0.0%)            | 1/56 (1.8%)            | 0/35 (0.0%)            | 492,005            | 3.21              |
| Gelderland Midden                                | 203           | 1          | 0.5%        | 1              | 201          | 0/109 (0.0%)            | 1/94 (1.1%)            | 0/26 (0.0%)            | 0/22 (0.0%)          | 1/40 (2.5%)            | 0/59 (0.0%)            | 0/56 (0.0%)            | 685,150            | 2.96              |
| Rotterdam-Rijnmond                               | 237           | 1          | 0.4%        | 0              | 236          | 1/136 (0.7%)            | 0/101 (0.0%)           | 0/42 (0.0%)            | 0/27 (0.0%)          | 1/36 (2.8%)            | 0/74 (0.0%)            | 0/58 (0.0%)            | 1,303,205          | 1.82              |
| Fryslân                                          | 389           | 1          | 0.3%        | 2              | 386          | 0/199 (0.0%)            | 1/190 (0.5%)           | 0/42 (0.0%)            | 0/27 (0.0%)          | 0/82 (0.0%)            | 0/116 (0.0%)           | 1/122 (0.8%)           | 647,260            | 6.01              |
| Flevoland                                        | 34            | 0          | 0.0%        | 0              | 34           | 0/20 (0.0%)             | 0/14 (0.0%)            | 0/4 (0.0%)             | 0/4 (0.0%)           | 0/4 (0.0%)             | 0/13 (0.0%)            | 0/9 (0.0%)             | 411,675            | 0.83              |
| Gooi en Vechtstreek                              | 26            | 0          | 0.0%        | 0              | 26           | 0/17 (0.0%)             | 0/9 (0.0%)             | 0/1 (0.0%)             | 0/2 (0.0%)           | 0/5 (0.0%)             | 0/9 (0.0%)             | 0/9 (0.0%)             | 252,975            | 1.03              |
| Abroad (Belgium, Germany)                        | 5             | 0          | 0.0%        | 0              | 5            | 0/4 (0.0%)              | 0/1 (0.0%)             | -                      | -                    | 0/2 (0.0%)             | 0/2 (0.0%)             | 0/1 (0.0%)             | n.a.               | n.a.              |
| <b>Total</b>                                     | <b>7,361</b>  | <b>200</b> | <b>2.7%</b> | <b>30</b>      | <b>7,131</b> | <b>105/3,844 (2.7%)</b> | <b>95/3,517 (2.7%)</b> | <b>52/1,251 (4.2%)</b> | <b>22/882 (2.5%)</b> | <b>31/1,354 (2.3%)</b> | <b>48/2,132 (2.3%)</b> | <b>47/1,742 (2.7%)</b> | <b>17,179,880</b>  | <b>4.28</b>       |
